# Supplementary material
Source: PubMed Central journal article supplement (PMC2779718)
Supplement: NIHMS128024-supplement-01.pdf [file NIHMS128024-supplement-01.pdf]

Type of file: figure

Label: 7

Filename: figure\_7.tif

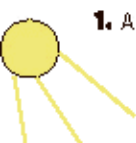

1. A projection is the data shadow of this light upon the principal components plot

2. Cell line/phospho-signal measurements are plotted in terms of original time variables

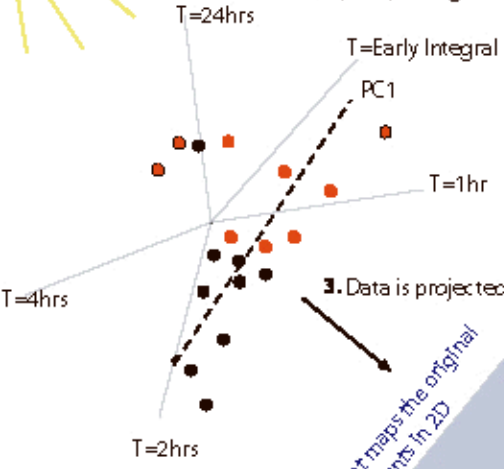

3. Data is projected onto a 2 dimensional principal components (PC) plot

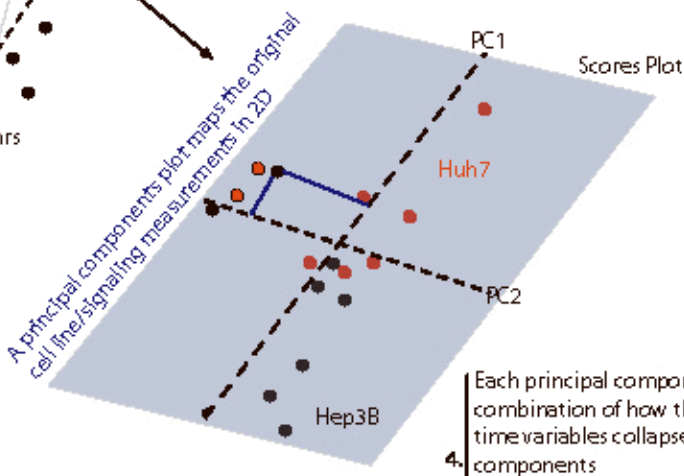

4. Each principal component is just a weighted combination of how the original measured time variables collapse onto the principal components

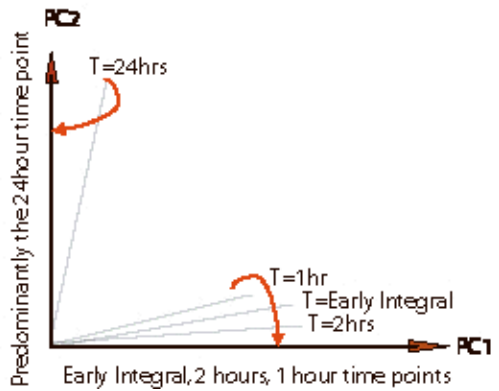

5. The first principal component captures the direction in which the most co-variation is seen. The second principal component captures the second most.

Type of file: figure

Label: 8

Filename: figure\_8.tif

Pritchard et al. Supplementary Figure 2

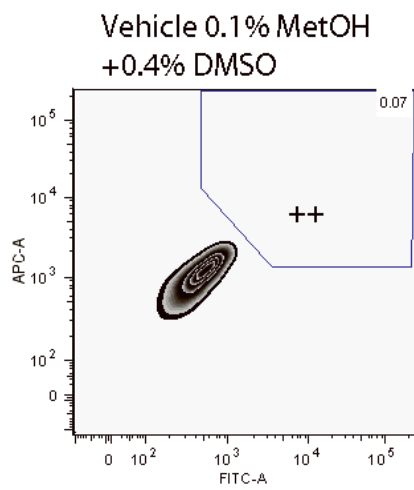

FSC-A, SSC-A subset  
491168.fcs  
Event Count: 11353

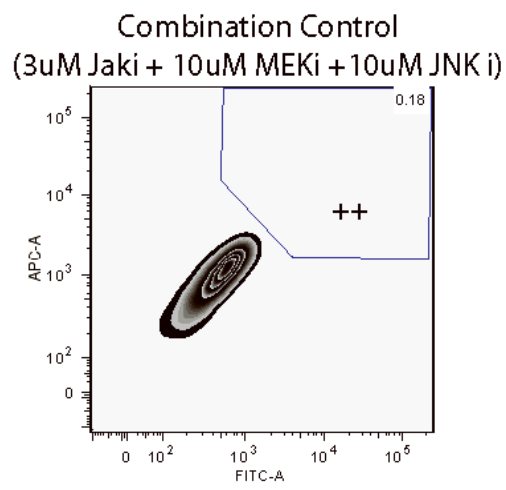

FSC-A, SSC-A subset  
491170.fcs  
Event Count: 10299

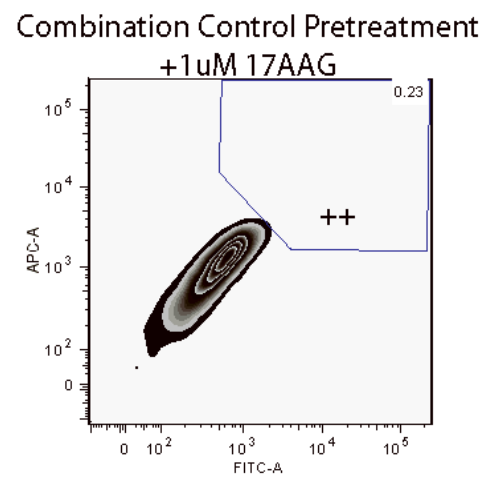

FSC-A, SSC-A subset  
491176.fcs  
Event Count: 10593
